# Supplementary material
Source: PubMed Central journal article supplement (PMC4079132)
Supplement: CJP-2014-vol59-April-187-195-eTable2.pdf [file CJP-2014-vol59-April-187-195-eTable2.pdf]

Briand C, Menear M. Implementing a continuum of evidence-based psychosocial interventions for people with severe mental illness: part 2—review of critical implementation issues. *Can J Psychiatry*. 2014;59(4):187–195.

eTable 2. Content of each of the articles informing Part 2 of this review mapped onto these CFIR constructs and domains
